# Supplementary material for: Life Cycle Assessment of River Sand and Aggregates Alternatives in Concrete
Source: MDPI journal article supplement (doi:10.3390/ma16052064), 2023-03-02
Supplement: s1 [file s1]

## Supplementary materials

**Table S1.** Results of unconfined compressive strengths of the base formulation.

| Basic Formulation | Specimen                    | Sample 1   | Sample 2   | Sample 3   |
|-------------------|-----------------------------|------------|------------|------------|
| C 25/30           | Manufacture                 | 04.02.2021 | 04.02.2021 | 04.02.2021 |
|                   | UCS Testing                 | 05.03.2021 | 05.03.2021 | 05.03.2021 |
|                   | UCS [MPa]                   | 30.71      | 29.90      | 31.23      |
|                   | Mean Value $\sigma_D$ [MPa] | 30.61      |            |            |

**Table S2.** Results of the unconfined compressive strengths of the base formulation with potential primary m-sand substitutes.

| Formulation | Specimen                    | Base-SR-1  | Base-SR-2  | Base-SR-3  |
|-------------|-----------------------------|------------|------------|------------|
| C 25/30     | Manufacture                 | 10.12.2021 | 10.12.2021 | 10.12.2021 |
| SR          | UCS Testing                 | 07.01.2022 | 07.01.2022 | 07.01.2022 |
|             | UCS [MPa]                   | 30.11      | 28.72      | 29.80      |
|             | Mean Value $\sigma_D$ [MPa] | 29.54      |            |            |
| Formulation | Specimen                    | Base-SB-1  | Base-SB-2  | Base-SB-3  |
| C 25/30     | Manufacture                 | 04.02.2021 | 04.02.2021 | 04.02.2021 |
| SB          | UCS Testing                 | 05.03.2021 | 05.03.2021 | 05.03.2021 |
|             | UCS [MPa]                   | 30.71      | 29.90      | 31.23      |
|             | Mean Value $\sigma_D$ [MPa] | 30.61      |            |            |
| Formulation | Specimen                    | Base-MA-1  | Base-MA-2  | Base-MA-3  |
| C 25/30     | Manufacture                 | 06.12.2021 | 06.12.2021 | 06.12.2021 |
| MA          | UCS Testing                 | 03.01.2022 | 03.01.2022 | 03.01.2022 |
|             | UCS [MPa]                   | 27.46      | 34.27      | 31.69      |
|             | Mean Value $\sigma_D$ [MPa] | 31.14      |            |            |
| Formulation | Specimen                    | Base-AM-1  | Base-AM-2  | Base-AM-3  |
| C 25/30     | Manufacture                 | 06.12.2021 | 06.12.2021 | 06.12.2021 |
| AM          | UCS Testing                 | 03.01.2022 | 03.01.2022 | 03.01.2022 |
|             | UCS [MPa]                   | 6.87       | 5.82       | 9.99       |
|             | Mean Value $\sigma_D$ [MPa] | 7.56       |            |            |
| Formulation | Specimen                    | Base-GD-1  | Base-GD-2  | Base-GD-3  |
| C 25/30     | Manufacture                 | 06.12.2021 | 06.12.2021 | 06.12.2021 |
| GD          | UCS Testing                 | 03.01.2022 | 03.01.2022 | 03.01.2022 |

|                    |                             |                  |                  |                  |
|--------------------|-----------------------------|------------------|------------------|------------------|
|                    | UCS [MPa]                   | 28.52            | 32.27            | 29.21            |
|                    | Mean Value $\sigma_D$ [MPa] |                  | 30.00            |                  |
| <b>Formulation</b> | <b>Specimen</b>             | <b>Base-BA-1</b> | <b>Base-BA-2</b> | <b>Base-BA-3</b> |
| C 25/30            | Manufacture                 | 10.12.2021       | 10.12.2021       | 10.12.2021       |
| BA                 | UCS Testing                 | 07.01.2022       | 07.01.2022       | 07.01.2022       |
|                    | UCS [MPa]                   | 31.62            | 28.04            | 26.08            |
|                    | Mean Value $\sigma_D$ [MPa] |                  | 28.58            |                  |

**Table S3.** Results of the unconfined compressive strengths of the base formulation with potential secondary m-sand substitutes.

|                    |                            |                 |                 |                 |
|--------------------|----------------------------|-----------------|-----------------|-----------------|
| <b>Formulation</b> | <b>Specimen</b>            | <b>Sample 1</b> | <b>Sample 2</b> | <b>Sample 3</b> |
| C 25/30            | Manufacture                | 13.04.2022      | 13.04.2022      | 13.04.2022      |
| CB + SB            | UCS Testing                | 11.05.2022      | 11.05.2022      | 11.05.2022      |
| 10 : 90 Vol.-%     | UCS [MPa]                  | 24.45           | 25.53           | 29.94           |
|                    | $\emptyset \sigma_D$ [MPa] |                 | 26.64           |                 |
| <b>Formulation</b> | <b>Specimen</b>            | <b>Sample 1</b> | <b>Sample 2</b> | <b>Sample 3</b> |
| C 25/30            | Manufacture                | 13.04.2022      | 13.04.2022      | 13.04.2022      |
| CB + SB            | UCS Testing                | 11.05.2022      | 11.05.2022      | 11.05.2022      |
| 30 : 70 Vol.-%     | UCS [MPa]                  | 7.44            | 11.27           | 13.91           |
|                    | $\emptyset \sigma_D$ [MPa] |                 | 10.87           |                 |
| <b>Formulation</b> | <b>Specimen</b>            | <b>Sample 1</b> | <b>Sample 2</b> | <b>Sample 3</b> |
| C 25/30            | Manufacture                | 13.12.2021      | 13.12.2021      | 13.12.2021      |
| CB + SB            | UCS Testing                | 10.01.2022      | 10.01.2022      | 10.01.2022      |
| 50 : 50 Vol.-%     | UCS [MPa]                  | 2.71            | 3.05            | 4.49            |
|                    | $\emptyset \sigma_D$ [MPa] |                 | 3.42            |                 |
| <b>Formulation</b> | <b>Specimen</b>            | <b>Sample 1</b> | <b>Sample 2</b> | <b>Sample 3</b> |
| C 25/30            | Manufacture                | 08.03.2022      | 08.03.2022      | 08.03.2022      |
| CC + SB            | UCS Testing                | 05.04.2022      | 05.04.2022      | 05.04.2022      |
|                    | UCS [MPa]                  | 21.65           | 20.07           | 26.22           |
| 10 : 90 Vol.-%     | $\emptyset \sigma_D$ [MPa] |                 | 22.65           |                 |
| <b>Formulation</b> | <b>Specimen</b>            | <b>Sample 1</b> | <b>Sample 2</b> | <b>Sample 3</b> |
| C 25/30            | Manufacture                | 08.03.2022      | 08.03.2022      | 08.03.2022      |
| CC + SB            | UCS Testing                | 05.04.2022      | 05.04.2022      | 05.04.2022      |
| 30 : 70 Vol.-%     | UCS [MPa]                  | 21.13           | 17.72           | 25.65           |

|                | Ø $\sigma_D$ [MPa] | 21.50      |            |            |
|----------------|--------------------|------------|------------|------------|
| Formulation    | Specimen           | Sample 1   | Sample 2   | Sample 3   |
| C 25/30        | Manufacture        | 08.03.2022 | 08.03.2022 | 08.03.2022 |
| CC + SB        | Testing            | 05.04.2022 | 05.04.2022 | 05.04.2022 |
| 50 : 50 Vol.-% | UCS [MPa]          | 8.27       | 4.17       | 10.59      |
|                | Ø $\sigma_D$ [MPa] | 7.68       |            |            |

**Table S4.** Results of the unconfined compressive strengths of the base formulation with various ash shares as cement substitute.

|       |                    | 10% Ash         |                 |                 | 20% Ash         |                 |                 | 30% Ash         |                 |                 |
|-------|--------------------|-----------------|-----------------|-----------------|-----------------|-----------------|-----------------|-----------------|-----------------|-----------------|
| Ash 1 | Specimen           | 10%             | 10%             | 10%             | 20%             | 20%             | 20%             | 30%             | 30%             | 30%             |
| CA    | Manufacture        | 04.02.2022<br>1 |
|       | UCS Testing        | 05.03.2022<br>1 |
|       | UCS [MPa]          | 32,02           | 35,68           | 30,47           | 19,20           | 16,65           | 16,19           | 14,33           | 12,61           | 14,14           |
|       | Ø $\sigma_D$ [MPa] | 32,72           |                 |                 | 17,35           |                 |                 | 13,69           |                 |                 |
| Ash 2 | Specimen           | 10%             | 10%             | 10%             | 20%             | 20%             | 20%             | 30%             | 30%             | 30%             |
| FA    | Manufacture        | 04.02.2022<br>1 |
|       | UCS Testing        | 05.03.2022<br>1 |
|       | UCS [MPa]          | 15,70           | 17,49           | 16,05           | 14,88           | 15,60           | 14,61           | 12,50           | 14,98           | 15,25           |
|       | Ø $\sigma_D$ [MPa] | 16,41           |                 |                 | 15,03           |                 |                 | 14,24           |                 |                 |
| Ash 3 | Specimen           | 10%             | 10%             | 10%             | 20%             | 20%             | 20%             | 30%             | 30%             | 30%             |
| LFA 1 | Manufacture        | 04.02.2022<br>1 |
|       | UCS Testing        | 05.03.2022<br>1 |
|       | UCS [MPa]          | 30,31           | 28,40           | 32,30           | 24,34           | 23,28           | 26,26           | 21,07           | 23,78           | 19,07           |
|       | Ø $\sigma_D$ [MPa] | 30,33           |                 |                 | 24,63           |                 |                 | 21,31           |                 |                 |
| Ash 4 | Specimen           | 10%             | 10%             | 10%             | 20%             | 20%             | 20%             | 30%             | 30%             | 30%             |
| LFA 2 | Manufacture        | 04.02.2022<br>1 |
|       | UCS Testing        | 05.03.2022<br>1 |
|       | UCS [MPa]          | 27,87           | 27,64           | 25,18           | 27,16           | 22,91           | 26,64           | 15,32           | 19,17           | 15,08           |
|       | Ø $\sigma_D$ [MPa] | 26,90           |                 |                 | 25,57           |                 |                 | 16,52           |                 |                 |
| Ash 5 | Specimen           | 10%             | 10%             | 10%             | 20%             | 20%             | 20%             | 30%             | 30%             | 30%             |

|     |                       |            |            |            |            |            |            |            |            |            |
|-----|-----------------------|------------|------------|------------|------------|------------|------------|------------|------------|------------|
| RHA | Manufacture           | 19.11.2021 | 19.11.2021 | 19.11.2021 | 19.11.2021 | 19.11.2021 | 19.11.2021 | 19.11.2021 | 19.11.2021 | 19.11.2021 |
|     |                       | 1          | 1          | 1          | 1          | 1          | 1          | 1          | 1          | 1          |
|     | UCS Testing           | 17.12.2021 | 17.12.2021 | 17.12.2021 | 17.12.2021 | 17.12.2021 | 17.12.2021 | 17.12.2021 | 17.12.2021 | 17.12.2021 |
|     |                       | 1          | 1          | 1          | 1          | 1          | 1          | 1          | 1          | 1          |
|     | UCS [MPa]             | 35,47      | 19,22      | 29,11      | 19,32      | 9,11       | 14,27      | 7,23       | 3,98       | 8,00       |
|     | Ø <sub>σD</sub> [MPa] | 27,94      |            | 14,23      |            |            |            | 6,40       |            |            |
